# Supplementary figures and images for: Photoresponsive porous ZnO-based broad-spectrum venom first-aid treatment
Source: Royal Society of Chemistry journal article supplement (doi:10.1039/d1bm00115a), 2021-01-01

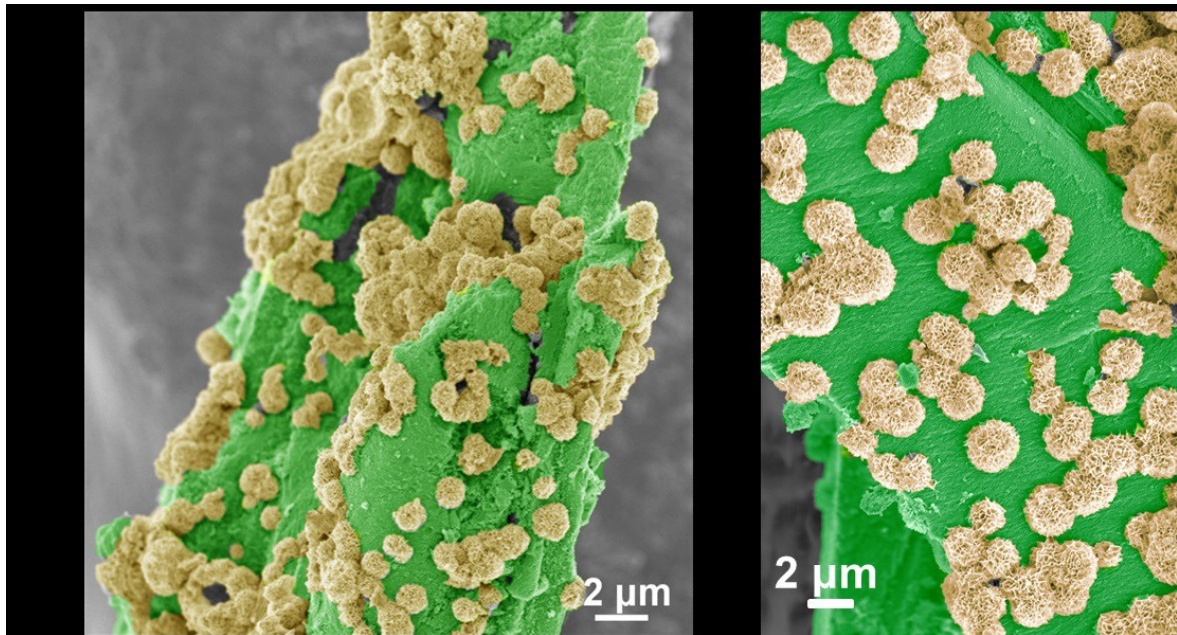

Supplement: d1bm00115a2.pdf [file d1bm00115a2.pdf]
